1 **Selection and co-selection of antibiotic resistances among *Escherichia coli* by antibiotic use in**  
2 **primary care: an ecological analysis**

3

4 **Short title:** Antibiotic prescribing and resistance

5

6 Koen B Pouwels<sup>1,2</sup>, Berit Muller-Pebody<sup>3</sup>, Timo Smieszek<sup>1,4</sup>, Susan Hopkins<sup>3,5,6</sup>, Julie V Robotham<sup>1,5</sup>

7

8 1. Modelling and Economics Unit, National Infection Service, Public Health England, London, United  
9 Kingdom.

10 2. Department of Health Sciences, Global Health, University Medical Centre Groningen, University of  
11 Groningen, Groningen, The Netherlands.

12 3. Healthcare-Associated Infection and Antimicrobial Resistance Division, National Infection Service,  
13 Public Health England, London, United Kingdom.

14 4. MRC Centre for Outbreak Analysis and Modelling, Department of Infectious Disease Epidemiology,  
15 Imperial College School of Public Health, London, United Kingdom.

16 5. NIHR Health Protection Research Unit in Healthcare Associated Infections and Antimicrobial  
17 Resistance at University of Oxford in partnership with Public Health England, Oxford, United  
18 Kingdom.

19 6. Directorate of Infection, Royal Free London NHS Foundation Trust, London, UK

20

21

22

23 **Correspondence to:** Koen B. Pouwels, Modelling and Economics Unit, National Infection Service,

24 Public Health England, 61 Colindale Ave, London NW9 5EQ, United Kingdom; email:

25 k.b.pouwels@gmail.com; phone: +44 (0)20 8327 6377

26 **Abstract**

27 The majority of studies that link antibiotic usage and resistance focus on simple associations  
28 between the resistance against a specific antibiotic and the use of that specific antibiotic. However,  
29 the relationship between antibiotic use and resistance is more complex. Here we evaluate which  
30 antibiotics, including those mainly prescribed for respiratory tract infections, are associated with  
31 increased resistance among *Escherichia coli* isolated from urinary samples.

32

33 Monthly primary care prescribing data were obtained from National Health Service (NHS) Digital.  
34 Positive *E. coli* records from urine samples in English primary care (n=888,207) between April 2014  
35 and January 2016 were obtained from the Second Generation Surveillance System. Elastic net  
36 regularization was used to evaluate associations between prescribing of different antibiotic groups  
37 and resistance against amoxicillin, cephalexin, ciprofloxacin, co-amoxiclav and nitrofurantoin at the  
38 clinical commissioning group (CCG) level. England is divided into 209 CCGs, with each NHS practice  
39 prolonging to one CCG.

40 Amoxicillin prescribing (measured in DDD/ 1000 inhabitants / day) was positively associated with  
41 amoxicillin (RR 1.03, 95% CI 1.01 – 1.04) and ciprofloxacin (RR 1.09, 95% CI 1.04 – 1.17) resistance. In  
42 contrast, nitrofurantoin prescribing was associated with lower levels of resistance to amoxicillin (RR  
43 0.92, 95% CI 0.84 – 0.97). CCGs with higher levels of trimethoprim prescribing also had higher levels  
44 of ciprofloxacin resistance (RR 1.34, 95% CI 1.10 – 1.59).

45

46 Amoxicillin, which is mainly (and often unnecessarily) prescribed for respiratory tract infections is  
47 associated with increased resistance against various antibiotics among *E. coli* causing urinary tract  
48 infections. Our findings suggest that when predicting the potential impact of interventions on  
49 antibiotic resistances it is important to account for use of other antibiotics, including those typically  
50 used for other indications.

51

52 **Author summary:**

53 Antibiotic resistance is increasingly recognised as a threat to modern healthcare. Effective antibiotics  
54 are crucial for treatment of serious bacterial infections and are necessary to avoid that complicated  
55 surgical procedures and chemotherapy becoming life-threatening. Antibiotic use is one of the main  
56 drivers of antibiotic resistance. The majority of antibiotic prescriptions are prescribed in primary  
57 care, however, a large proportion of these antibiotic prescriptions are unnecessary. Understanding  
58 which antibiotics are causing antibiotic resistance to what extent is needed to prevent under- or  
59 over-investment in interventions lowering use of specific antibiotics, such as rapid diagnostic tests  
60 for respiratory tract infection.

61 We have statistically evaluated which antibiotics are associated with higher and lower levels of  
62 antibiotic resistance against common antibiotics among *Escherichia coli* bacteria sampled from the  
63 urinary tract by comparing antibiotic prescribing and resistance in different geographical areas in  
64 England. Our model shows that amoxicillin, the most commonly used antibiotic in England and  
65 mainly used for respiratory tract infections, is associated with increased resistance against several  
66 other antibiotics among bacteria causing urinary tract infections. The methods used in this study,  
67 that overcome several of the limitations of previous studies, can be used to explore the complex  
68 relationships between antibiotic use and antibiotic resistance in other settings.

69

70

71

72

73

74

75

76 **Introduction**

77 In England, approximately three-quarters of antibiotics are dispensed in primary care [1]. A  
78 substantial proportion of these antibiotics are unnecessary, being used for viral or self-limiting  
79 respiratory tract infections [2, 3]. When antibiotics are used for a viral infection an effect on the  
80 pathogen causing the infection, both in terms of outcome of the infection as well as resistance  
81 against antibiotics, is not expected. However, because antibiotics typically used for respiratory tract  
82 infections, such as amoxicillin, have a systemic effect, they can select for antibiotic resistances  
83 among bacteria that are carried by the host at the moment of treatment, i.e. bacteria forming the  
84 microflora or microbiota [4]. If those bacteria are pathogenic or act as a reservoir of resistance  
85 elements this may lead to an increased incidence of symptomatic infections caused by bacteria that  
86 are resistant to clinically important antibiotics [5, 6]. Moreover, antibiotic prescriptions are often  
87 longer than necessary, which could further increase antibiotic resistance levels without clinical  
88 benefit [7]. However, the relationship between antibiotic use and antibiotic resistance is more  
89 complex. There may be cross-resistance between antibiotics, such as observed for ampicillin and  
90 amoxicillin [8]. Resistance genes may be linked on the same mobile genetic element, such as  
91 observed for amoxicillin and trimethoprim resistance genes [8, 9]. Therefore treatment with one  
92 antibiotic may select for resistance against another antibiotic via cross-resistance and co-selection  
93 [8, 9]. Treatment with one antibiotic may also simply kill competing bacterial flora, thereby providing  
94 bacteria resistant to another antibiotic more space and nutrients, such as anti-anaerobic antibiotics  
95 that promote the overgrowth of vancomycin-resistant enterococci [10, 11]. Moreover, mutations or  
96 acquired genes conferring resistance to one antibiotic can not only increase but also decrease  
97 resistance to another antibiotic [12]. Such collateral sensitivity, where resistance against one  
98 antibiotic confers sensitivity against another has been mainly explored for spontaneous resistance  
99 mutations [12, 13].  
100 The vast majority of studies that link antibiotic usage and resistance at the population level focus on  
101 simple associations between the resistance against a specific antibiotic and the use of that specific

102 antibiotic or antibiotic group, or alternatively group all antibiotics together [14]. There is a lack of  
103 studies that simultaneously take into account use of different antibiotics and potential co-selection.  
104

105 We therefore evaluated associations between prescribing levels of antibiotic groups in primary care  
106 in England and resistance against amoxicillin, cephalexin, ciprofloxacin, co-amoxiclav and  
107 nitrofurantoin, among *Escherichia coli* isolated from urinary samples in England, thereby taking into  
108 account prescribing of other antibiotics groups. Because we only had data on antibiotic prescribing  
109 in primary care, we focused on *E. coli* sampled from the urinary tract by general practitioners. We  
110 used elastic net regularization [15, 16], because this method – which combines the advantages of  
111 both least absolute shrinkage and selection operator (lasso) [17] and ridge regression [18] – works  
112 particularly well in situations with high collinearity and relative large number of variables compared  
113 to the amount of observations [15, 16]. This is particularly relevant, because there are many  
114 different antibiotic groups and there are likely strong correlations between prescribing patterns of  
115 antibiotics leading to sparsity and multicollinearity problems with standard regression techniques  
116 [19].

117 The vast majority urinary tract infections are caused by *E. coli* infections and uropathogenic *E. coli*  
118 strains are often part of the human intestinal microflora. Given the systemic nature of systemic  
119 antibiotics, this research may shed light on the question whether and to what extent antibiotics  
120 typically being used to treat (viral) respiratory tract infections, such as amoxicillin [1], may result in  
121 resistance problems against not only the same antibiotic, but also other antibiotics among bacteria  
122 for which the antibiotic courses were not initially intended.

123

124 The work presented in this paper provides evidence about which antibiotics are associated with  
125 higher and lower levels of antibiotic resistance against common antibiotics among *Escherichia coli*  
126 bacteria sampled from the urinary tract by comparing antibiotic prescribing and resistance in  
127 different geographical areas in England. Our models show that amoxicillin, the most commonly used

128 antibiotic in England and mainly used for respiratory tract infections, is associated with increased  
129 resistance against several other antibiotics among bacteria causing urinary tract infections. The  
130 methods used in this study, that overcome several of the limitations of previous studies, can be used  
131 to explore the complex relationships between antibiotic use and antibiotic resistance in other  
132 settings.

133

134

135

## 136 Results

137 The antibiotic groups that were used most intensively with  $\geq 1$  daily defined doses (DDD) per 1000  
138 inhabitants per day, were tetracyclines, penicillins with extended spectrum (mainly amoxicillin) [1],  
139 macrolides, Beta-lactamase-resistant penicillins (mainly [Flucloxacillin](#)) [1], and trimethoprim (Fig 1).

140

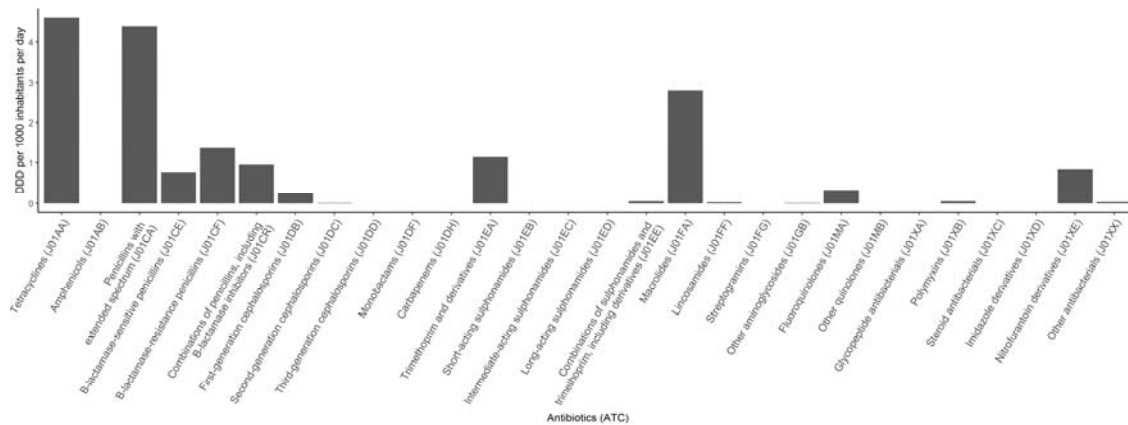

141

142 **Fig 1.** The average DDD per 1000 inhabitants per day for different antibiotic groups during the study  
143 period.

144

145 While we evaluated the association between resistances of interest and all antibiotic groups, Fig 2  
146 shows the variation in prescribing between the different clinical commissioning groups (CCGs) for  
147 the 4 antibiotic groups that are prescribed the most. In addition, these maps show the variation in

148 nitrofurantoin and trimethoprim, which are the antibiotics typically used to treat urinary tract  
149 infections. There was substantial variation in antibiotic prescribing between the different CCGs (Fig  
150 2), some CCGs had high antibiotic prescribing levels for all antibiotics, especially in the North of  
151 England. There was generally more variation in antibiotic prescribing between CCGs than variation  
152 over time within CCGs. However, for some antibiotics there were clear peaks in the amount of  
153 dispensed antibiotics, in line with peaks in the incidence of respiratory tract infections (winter) and  
154 skin infections (summer) (S1, Fig S1-S2).

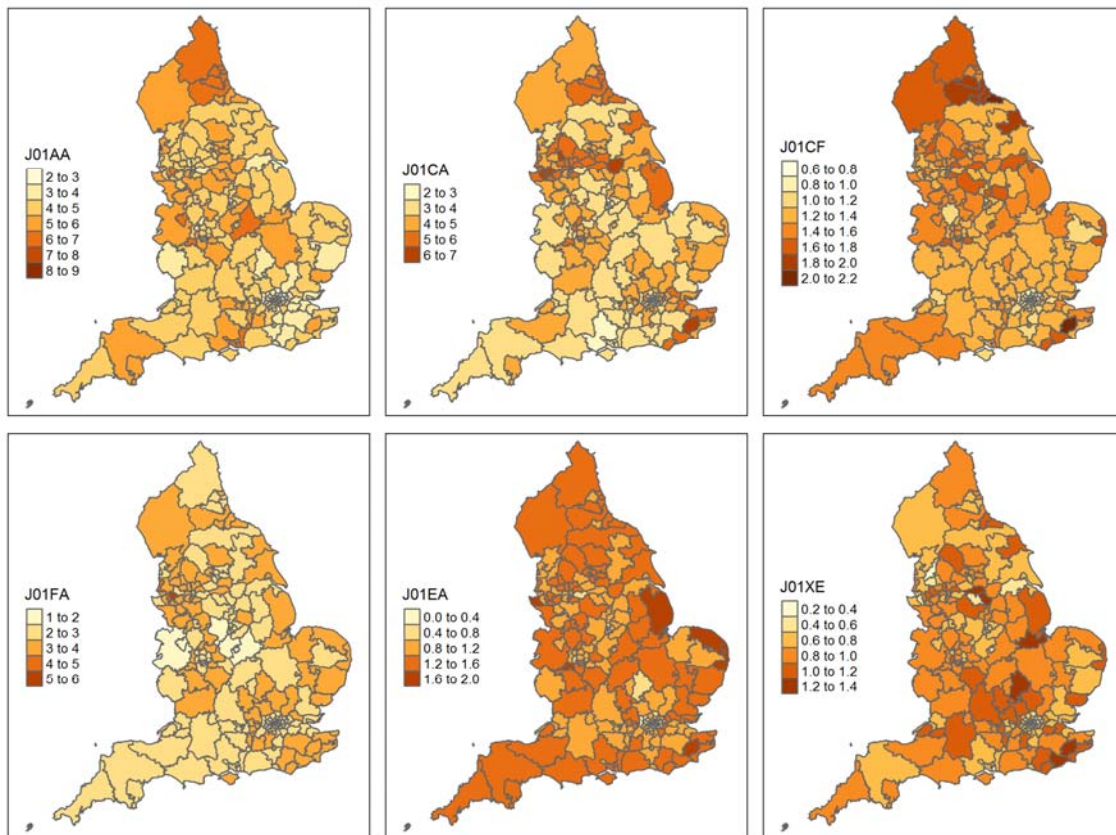

155  
156 **Fig 2.** Maps of the average number of DDD per 1000 inhabitants per day for the 209 clinical  
157 commissioning groups during the study period. Not that different scales are used for the different  
158 antibiotics. J01AA = tetracyclines; J01CA = penicillins with extended spectrum (mainly amoxicillin);  
159 J01CF = Beta-lactamase-resistant penicillins (mainly flucloxacillin); J01FA = macrolides; J01EA =  
160 trimethoprim; J01XE = nitrofurantoin.

161

162 Between April 2014 and January 2016, nearly all (99%, n=888,207) *E. coli* urinary samples from  
163 general practice patients sent in for laboratory testing were tested for resistance against  
164 nitrofurantoin. The percentages of samples tested for resistance against the other included  
165 antibiotics varied between 78% for amoxicillin and 90% for co-amoxiclav.  
166 There was substantial variation in the percentage of *E. coli* urinary isolates that were resistant to the  
167 antibiotics tested (Table 1).

168

169 **Table 1.** Variation in antibiotic resistance among *E. coli* urinary samples, measured on a monthly  
170 basis at the clinical commissioning group level.

|                | Percentage of <i>E. coli</i> samples resistant to antibiotic, median<br>(25 <sup>th</sup> – 75 <sup>th</sup> percentile) |
|----------------|--------------------------------------------------------------------------------------------------------------------------|
| Amoxicillin    | 53% (49% - 58%)                                                                                                          |
| Nitrofurantoin | 2% (1% - 4%)                                                                                                             |
| Cephalexin     | 8% (6% - 11%)                                                                                                            |
| Ciprofloxacin  | 11% (8% - 16%)                                                                                                           |
| Co-amoxiclav   | 11% (7% - 23%)                                                                                                           |

171

172

173 There was less variation in the percentage of isolates that were resistant to the antibiotics test over  
174 time (S1, Fig S3-S7). The variation in testing rate, which may influence apparent antibiotic resistance  
175 proportions, and variation in the measured antibiotic resistance proportions are shown in Fig 3. As is  
176 apparent from the maps, part of the variation in the apparent proportion of samples that are  
177 resistant to antibiotics can be explained by the test rate. When few tests are determined, most of  
178 the samples are resistant. However, there are also regions with a relatively high test rate and still  
179 relatively high resistance, such as in the North-East, indicating that the resistance prevalence may  
180 indeed be relatively high.

181



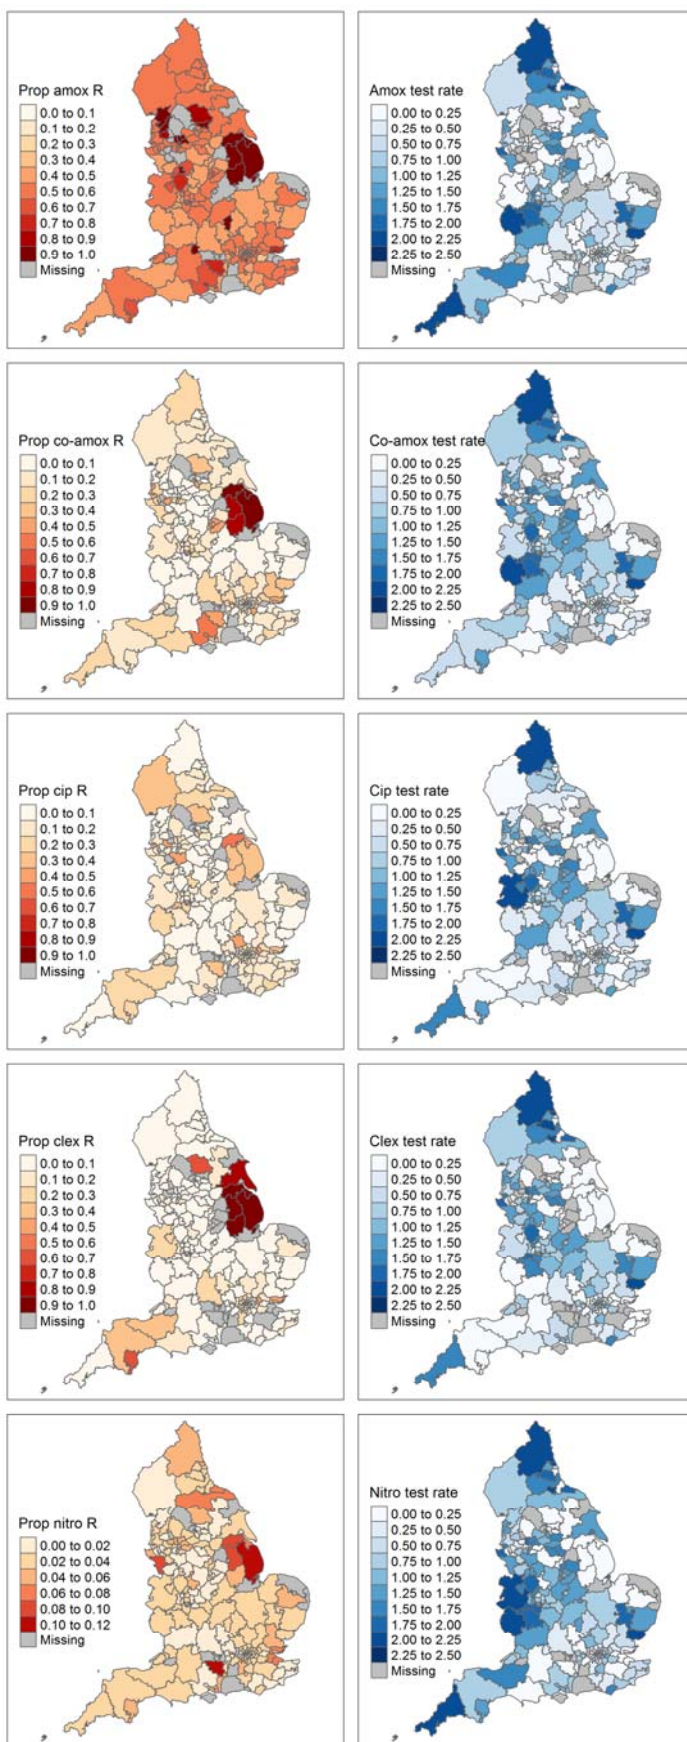

183 **Fig 3.** The left column shows the proportion of *E. coli* urinary samples that are resistant to  
 184 amoxicillin, co-amoxiclav, ciprofloxacin, cephalixin and nitrofurantoin, respectively. The right  
 185 column shows the number of samples tested for resistance against these antibiotics per 1000  
 186 person-months.

187  
 188 Results from the elastic net regularization models showed amoxicillin resistance holder was positively  
 189 associated with prescribing of penicillins with extended spectrum (mainly amoxicillin in England)<sup>1</sup> in  
 190 the month (RR 1.03, 95%CI 1.01 to 1.04), quarter (RR 1.03, 95%CI 1.01 to 1.04) and year (RR 1.04,  
 191 95%CI 1.01 to 1.06) (Table 2; the full results including the coefficients for the test rate are provided  
 192 in S2) before the specimen date.

193  
 194 **Table 2.** Associations between amoxicillin resistance among *E. coli* urinary samples and antibiotic  
 195 prescribing (DDD per 1000 persons per day)

| Antibiotic prescribed                                                        | Amoxicillin resistance, antibiotic prescribing 1 month before. RR (2.5th–97.5th percentile of bootstrap) | Amoxicillin resistance, antibiotic prescribing 1-3 month before. RR (2.5th–97.5th percentile of bootstrap) | Amoxicillin resistance, antibiotic prescribing 1 year before. RR (2.5th–97.5th percentile of bootstrap) |
|------------------------------------------------------------------------------|----------------------------------------------------------------------------------------------------------|------------------------------------------------------------------------------------------------------------|---------------------------------------------------------------------------------------------------------|
| Tetracyclines (J01AA)                                                        | 1.00 (0.98 – 1.01)                                                                                       | 1.00 (0.98 – 1.02)                                                                                         | 1.00 (0.98 – 1.04)                                                                                      |
| Penicillins with extended spectrum (J01CA)                                   | <b>1.03 (1.01 – 1.04)<sup>a</sup></b>                                                                    | <b>1.03 (1.01 – 1.04)<sup>a</sup></b>                                                                      | <b>1.04 (1.01 – 1.06)<sup>a</sup></b>                                                                   |
| Beta-lactamase-sensitive penicillins (J01CE)                                 | 1.02 (0.97 – 1.12)                                                                                       | 1.00 (1.00 – 1.19)                                                                                         | -                                                                                                       |
| Beta-lactamase-resistant penicillins (J01CF)                                 | 1.03 (0.98 – 1.12)                                                                                       | 1.03 (0.96 – 1.13)                                                                                         | 1.04 (0.95 – 1.17)                                                                                      |
| Combinations of penicillins, including $\beta$ -lactamase inhibitors (J01CR) | 1.02 (0.95 – 1.08)                                                                                       | -                                                                                                          | -                                                                                                       |
| First-generation cephalosporins (J01DB)                                      | 1.01 (0.91 – 1.07)                                                                                       | -                                                                                                          | -                                                                                                       |
| Second-generation cephalosporins (J01DC)                                     | 1.00 (0.85 – 1.02)                                                                                       | -                                                                                                          | -                                                                                                       |
| Trimethoprim and derivatives (J01EA)                                         | 1.01 (0.98 – 1.08)                                                                                       | 1.01 (1.00 – 1.12)                                                                                         | 1.00 (1.00 – 1.17)                                                                                      |
| Macrolides (J01FA)                                                           | 0.99 (0.97 – 1.02)                                                                                       | 1.00 (0.97 – 1.03)                                                                                         | 1.00 (0.97 – 1.04)                                                                                      |
| Lincosamides (J01FF)                                                         | 0.98 (0.71 – 1.00)                                                                                       | -                                                                                                          | -                                                                                                       |
| Fluoroquinolones (J01MA)                                                     | <b>0.93 (0.78 – 0.99)<sup>a</sup></b>                                                                    | 0.87 (0.69 – 1.00)                                                                                         | 0.88 (0.61 – 1.00)                                                                                      |
| Polymyxins (J01XB)                                                           | 1.01 (0.93 – 1.35)                                                                                       | -                                                                                                          | -                                                                                                       |
| Nitrofuran derivatives (J01XE)                                               | <b>0.92 (0.84 – 0.97)<sup>a</sup></b>                                                                    | <b>0.91 (0.82 – 0.96)<sup>a</sup></b>                                                                      | <b>0.91 (0.83 – 0.98)<sup>a</sup></b>                                                                   |
| Other antibacterials (J01XX)                                                 | 0.98 (0.87 – 1.13)                                                                                       | -                                                                                                          | -                                                                                                       |

196 <sup>a</sup>Associations for which 2.5<sup>th</sup> and 97.5<sup>th</sup> percentile of the clustered bootstrap are both indicating an increased or decreased  
 197 risk.

198

199 A similar direct association was seen in that CCGs that used more nitrofurantoin had a higher  
200 percentage of *E. coli* samples that tested resistant to nitrofurantoin (RR 1.52, 95%CI 1.00 to 2.24)  
201 (Table 3). The data did not confirm such a relationship between first-generation cephalosporin use  
202 (mainly cephalexin in England)[1] and cephalalexin resistance, between fluoroquinolone use (mainly  
203 ciprofloxacin in England)[1] and ciprofloxacin resistance, or between combinations of penicillins,  
204 including  $\beta$ -lactamase inhibitors (mainly co-amoxiclav in England)[1] and co-amoxiclav resistance  
205 (Tables 4-6).  
206  
207

208 **Table 3.** Associations between nitrofurantoin resistance among *E. coli* urinary samples and antibiotic  
 209 prescribing (DDD per 1000 persons per day)

| Antibiotic prescribed                                                        | Nitrofurantoin resistance, antibiotic prescribing 1 month before. RR (2.5th–97.5th percentile of bootstrap) | Nitrofurantoin resistance, antibiotic prescribing 1-3 month before. RR (2.5th–97.5th percentile of bootstrap) | Nitrofurantoin resistance, antibiotic prescribing 1 year before. RR (2.5th–97.5th percentile of bootstrap) |
|------------------------------------------------------------------------------|-------------------------------------------------------------------------------------------------------------|---------------------------------------------------------------------------------------------------------------|------------------------------------------------------------------------------------------------------------|
| Tetracyclines (J01AA)                                                        | 1.01 (0.89 – 1.14)                                                                                          | 1.02 (0.91 – 1.19)                                                                                            | 1.01 (0.83 – 1.23)                                                                                         |
| Penicillins with extended spectrum (J01CA)                                   | 1.02 (0.96 – 1.15)                                                                                          | 1.03 (0.96 – 1.21)                                                                                            | 1.05 (0.91 – 1.28)                                                                                         |
| Beta-lactamase-sensitive penicillins (J01CE)                                 | 1.50 (0.73 – 2.02)                                                                                          | 1.46 (0.61 – 2.09)                                                                                            | 1.47 (0.47 – 2.31)                                                                                         |
| Beta-lactamase-resistant penicillins (J01CF)                                 | 1.01 (0.75 – 1.72)                                                                                          | -                                                                                                             | -                                                                                                          |
| Combinations of penicillins, including $\beta$ -lactamase inhibitors (J01CR) | -                                                                                                           | -                                                                                                             | 1.01 (0.21 – 3.04)                                                                                         |
| First-generation cephalosporins (J01DB)                                      | 1.76 (0.56 – 3.18)                                                                                          | 1.78 (0.41 – 3.27)                                                                                            | 1.85 (0.27 – 7.39)                                                                                         |
| Trimethoprim and derivatives (J01EA)                                         | <b>1.52 (1.15 – 2.08)<sup>a</sup></b>                                                                       | <b>1.50 (1.10 – 2.24)<sup>a</sup></b>                                                                         | 1.55 (1.00 – 2.56)                                                                                         |
| Combinations of sulfonamides and trimethoprim, including derivatives (J01EE) | -                                                                                                           | -                                                                                                             | 1.02 (0.09 – 56.66)                                                                                        |
| Macrolides (J01FA)                                                           | 0.93 (0.80 – 1.06)                                                                                          | 0.92 (0.78 – 1.09)                                                                                            | 0.90 (0.72 – 1.06)                                                                                         |
| Other aminoglycosides (J01GB)                                                | 45.87 (1.00 – 2.12x10 <sup>3</sup> )                                                                        | 59.16 (1.00 – 2.34*10 <sup>4</sup> )                                                                          | 21.05 (1.00 – 2.77*10 <sup>4</sup> )                                                                       |
| Polymyxins (J01XB)                                                           | -                                                                                                           | -                                                                                                             | 1.02 (0.10 – 12.39)                                                                                        |
| Nitrofurantoin derivatives (J01XE)                                           | <b>1.52 (1.00 – 2.24)<sup>a</sup></b>                                                                       | <b>1.60 (1.05 – 2.58)<sup>a</sup></b>                                                                         | <b>1.68 (1.01 – 3.04)<sup>a</sup></b>                                                                      |
| Other antibacterials (J01XX)                                                 | 0.84 (0.47 – 1.89)                                                                                          | 0.85 (0.48 – 2.14)                                                                                            | 0.76 (0.40 – 2.59)                                                                                         |

210 <sup>a</sup> Associations for which 2.5<sup>th</sup> and 97.5<sup>th</sup> percentile of the clustered bootstrap are both indicating an increased or decreased  
 211 risk.

212

213

214 **Table 4.** Associations between cephalixin resistance among *E. coli* urinary samples and antibiotic prescribing (DDD per 1000 persons per day)

| Antibiotic prescribed                                                        | Cephalixin resistance, antibiotic prescribing 1 month before. RR (2.5th–97.5th percentile of bootstrap) | Cephalixin resistance, antibiotic prescribing 1-3 month before. RR (2.5th–97.5th percentile of bootstrap) | Cephalixin resistance, antibiotic prescribing 1 year before. RR (2.5th–97.5th percentile of bootstrap) |
|------------------------------------------------------------------------------|---------------------------------------------------------------------------------------------------------|-----------------------------------------------------------------------------------------------------------|--------------------------------------------------------------------------------------------------------|
| Tetracyclines (J01AA)                                                        | 0.97 (0.89 – 1.02)                                                                                      | 0.97 (0.86 – 1.02)                                                                                        | 0.96 (0.85 – 1.05)                                                                                     |
| Penicillins with extended spectrum (J01CA)                                   | 0.99 (0.94 – 1.06)                                                                                      | 0.98 (0.90 – 1.06)                                                                                        | 0.96 (0.87 – 1.08)                                                                                     |
| Beta-lactamase-sensitive penicillins (J01CE)                                 | 0.98 (0.63 – 1.00)                                                                                      | 0.97 (0.56 – 1.00)                                                                                        | 0.95 (0.42 – 1.00)                                                                                     |
| Beta-lactamase-resistant penicillins (J01CF)                                 | 0.98 (0.70 – 1.35)                                                                                      | 0.98 (0.73 – 1.45)                                                                                        | 1.00 (0.69 – 1.65)                                                                                     |
| Combinations of penicillins, including $\beta$ -lactamase inhibitors (J01CR) | 0.98 (0.69 – 1.10)                                                                                      | 0.97 (0.67 – 1.13)                                                                                        | 0.95 (0.59 – 1.15)                                                                                     |
| First-generation cephalosporins (J01DB)                                      | 1.01 (0.94 – 1.41)                                                                                      | 1.01 (0.95 – 1.50)                                                                                        | 1.04 (0.92 – 1.78)                                                                                     |
| Trimethoprim and derivatives (J01EA)                                         | 1.03 (0.98 – 1.75)                                                                                      | 1.04 (0.98 – 1.87)                                                                                        | 1.08 (0.97 – 2.04)                                                                                     |
| Macrolides (J01FA)                                                           | 0.95 (0.75 – 1.00)                                                                                      | 0.94 (0.73 – 1.00)                                                                                        | <b>0.92 (0.70 – 1.00)<sup>a</sup></b>                                                                  |
| Fluoroquinolones (J01MA)                                                     | 1.00 (0.81 – 1.30)                                                                                      | 1.00 (0.77 – 1.34)                                                                                        | 1.01 (0.63 – 1.44)                                                                                     |
| Nitrofurans derivatives (J01XE)                                              | 1.01 (0.94 – 1.44)                                                                                      | 1.01 (0.94 – 1.51)                                                                                        | 1.04 (0.93 – 1.72)                                                                                     |
| Other antibacterials (J01XX)                                                 | -                                                                                                       | 1.00 (0.91 – 1.52)                                                                                        | -                                                                                                      |

<sup>a</sup> Associations for which 2.5<sup>th</sup> and 97.5<sup>th</sup> percentile of the clustered bootstrap are both indicating an increased or decreased risk.

215  
216

217 **Table 5.** Associations between ciprofloxacin resistance among *E. coli* urinary samples and antibiotic  
 218 prescribing (DDD per 1000 persons per day)

| Antibiotic prescribed                        | Ciprofloxacin resistance, antibiotic prescribing 1 month before. RR (2.5th–97.5th percentile of bootstrap) | Ciprofloxacin resistance, antibiotic prescribing 1-3 month before. RR (2.5th–97.5th percentile of bootstrap) | Ciprofloxacin resistance, antibiotic prescribing 1 year before. RR (2.5th–97.5th percentile of bootstrap) |
|----------------------------------------------|------------------------------------------------------------------------------------------------------------|--------------------------------------------------------------------------------------------------------------|-----------------------------------------------------------------------------------------------------------|
| Tetracyclines (J01AA)                        | <b>0.92 (0.88 – 0.98)<sup>a</sup></b>                                                                      | <b>0.92 (0.87 – 0.98)<sup>a</sup></b>                                                                        | 0.93 (0.85 – 1.01)                                                                                        |
| Penicillins with extended spectrum (J01CA)   | <b>1.09 (1.04 – 1.17)<sup>a</sup></b>                                                                      | <b>1.10 (1.03 – 1.19)<sup>a</sup></b>                                                                        | 1.13 (1.02 – 1.25)                                                                                        |
| Beta-lactamase-resistant penicillins (J01CF) | -                                                                                                          | -                                                                                                            | 0.96 (0.65 – 1.24)                                                                                        |
| Trimethoprim and derivatives (J01EA)         | <b>1.34 (1.10 – 1.59)<sup>a</sup></b>                                                                      | <b>1.35 (1.13 – 1.72)<sup>a</sup></b>                                                                        | <b>1.35 (1.11 – 1.78)<sup>a</sup></b>                                                                     |
| Macrolides (J01FA)                           | <b>0.85 (0.76 – 0.94)<sup>a</sup></b>                                                                      | <b>0.84 (0.75 – 0.94)<sup>a</sup></b>                                                                        | <b>0.84 (0.73 – 0.95)<sup>a</sup></b>                                                                     |
| Fluoroquinolones (J01MA)                     | 1.24 (1.00 – 2.81)                                                                                         | 1.29 (1.00 – 3.55)                                                                                           | 1.38 (1.00 – 4.40)                                                                                        |
| Nitrofurantoin                               | -                                                                                                          | -                                                                                                            | 1.00 (0.65 – 1.14)                                                                                        |

219 <sup>a</sup> Associations for which 2.5<sup>th</sup> and 97.5<sup>th</sup> percentile of the clustered bootstrap are both indicating an increased or decreased  
 220 risk.

221

222

223 **Table 6.** Associations between co-amoxiclav resistance among *E. coli* urinary samples and antibiotic  
 224 prescribing (DDD per 1000 persons per day)

| Antibiotic prescribed                                                 | Co-amoxiclav resistance, antibiotic prescribing 1 month before. RR (2.5th–97.5th percentile of bootstrap) | Co-amoxiclav resistance, antibiotic prescribing 1-3 month before. RR (2.5th–97.5th percentile of bootstrap) | Co-amoxiclav resistance, antibiotic prescribing 1 year before. RR (2.5th–97.5th percentile of bootstrap) |
|-----------------------------------------------------------------------|-----------------------------------------------------------------------------------------------------------|-------------------------------------------------------------------------------------------------------------|----------------------------------------------------------------------------------------------------------|
| Tetracyclines (J01AA)                                                 | 1.03 (0.89 – 1.31)                                                                                        | 1.04 (0.87 – 1.33)                                                                                          | 1.04 (0.87 – 1.35)                                                                                       |
| Penicillins with extended spectrum (J01CA)                            | 0.99 (0.74 – 1.00)                                                                                        | 0.98 (0.70 – 1.00)                                                                                          | 0.97 (0.68 – 1.02)                                                                                       |
| Beta-lactamase-sensitive penicillins (J01CE)                          | -                                                                                                         | -                                                                                                           | 1.00 (1.00 – 8.86)                                                                                       |
| Combinations of penicillins, including β-lactamase inhibitors (J01CR) | -                                                                                                         | -                                                                                                           | 1.00 (0.51 – 2.62)                                                                                       |
| Trimethoprim and derivatives (J01EA)                                  | -                                                                                                         | -                                                                                                           | 1.00 (0.54 – 2.30)                                                                                       |

225

226 However, it should be noted that a substantial proportion of these specific antibiotics are used in the  
227 hospital settings, for which no data was available [20]. Besides the obvious associations between  
228 prescribing of a particular antibiotic and resistance to that same antibiotic, we also observed  
229 associations between prescribing of a particular antibiotic and resistance against an antibiotic from  
230 another group. Amoxicillin use was not only associated with higher levels of amoxicillin resistance,  
231 but also with increased ciprofloxacin resistance (RR 1.09 95%CI 1.04 to 1.17) (Table 5) and increased  
232 trimethoprim resistance (as we have previously shown [8]). CCGs with high prescribing of  
233 trimethoprim also had higher levels of nitrofurantoin resistance (RR 1.52 95%CI 1.15 to 2.08) and  
234 ciprofloxacin resistance (RR 1.34 95%CI 1.10 to 1.59) (Tables 3 and 5).

235

236 There were also some antibiotics that had negative associations with antibiotic resistances.  
237 Nitrofurantoin use was associated with decreased amoxicillin resistance (RR 0.92 95%CI 0.84 to 0.97)  
238 (Table 2). Previously, we observed a similar negative association between nitrofurantoin use and  
239 trimethoprim resistance levels [8]. Tetracycline and macrolide use was associated with decreased  
240 ciprofloxacin resistance (Table 5), while fluoroquinolone use was associated with lower amoxicillin  
241 resistance levels (Table 2).

242

243 Results were very similar when restricting the analyses to months with at least 20 measurements  
244 (S2, Table S6-S10), suggesting that random error or remaining systematic error due to low testing  
245 probability were not large after adjusting for the test rate.

246

## 247 **Discussion**

248 We found evidence of both selection and co-selection, as well as geographical patterns in antibiotic  
249 use and resistance. Amoxicillin use, an antibiotic that is mainly used for respiratory tract infections  
250 (~83%) and rarely for urinary tract infections (~2%) [1], is associated with increased resistance  
251 against amoxicillin and ciprofloxacin among urinary tract infections caused by *E. coli*. Areas that used

252 more trimethoprim had higher levels of ciprofloxacin and nitrofurantoin resistance among *E. coli*  
253 urinary samples. These positive associations between prescribing of a particular antibiotic and  
254 resistance against another antibiotic suggest that co-selection may play a role.  
255 We found that use of amoxicillin and trimethoprim were associated with resistance against  
256 ciprofloxacin, which suggests that co-selection may be occurring. Isolates from the common *E. coli*  
257 urinary pathogenic clonal group ST131 are often non-susceptible to both fluoroquinolones and  
258 trimethoprim-sulfamethoxazole and/or  $\beta$ -lactam antibiotics [21, 22], which may explain why use of  
259 trimethoprim and amoxicillin would select for ciprofloxacin resistance as amoxicillin use likely also  
260 selects for bacteria with trimethoprim resistance genes [8]. This link is further supported by the  
261 ECO·SENS study that found that resistance to any agent was correlated with increased resistance to  
262 all other agents tested, except for fosfomicin [9].

263

264 Nitrofurantoin had a negative association with amoxicillin resistance. This is in line with our previous  
265 finding that areas with relatively high nitrofurantoin use have lower trimethoprim resistance levels.<sup>7</sup>  
266 Nitrofurantoin resistance genes are, in contrast to trimethoprim and amoxicillin resistance genes,  
267 not frequently found on mobile genetic elements with multiple resistances or correlated with  
268 multiple resistances in other ways [8, 11, 23]. Therefore, nitrofurantoin use may select for *E. coli* that  
269 are susceptible to amoxicillin and trimethoprim. Collateral sensitivity (and collateral resistance) has  
270 previously been observed for resistance against several antibiotics among *E. coli* isolates in an  
271 experimental setting [13]. Selecting for resistance against ampicillin was associated with increased  
272 sensitivity to nitrofurantoin compared to wild type *E. coli* strains [13], suggesting that collateral  
273 sensitivity may partly explain the observed negative association between amoxicillin and  
274 trimethoprim.

275 Given the high fitness cost of nitrofurantoin resistance [23], the positive association between  
276 trimethoprim use and nitrofurantoin resistance is not likely due to co-selection, but may be due to



277 the possibility that CCGs with high trimethoprim usage have more patients on long-term treatment  
278 or prophylaxis with trimethoprim and nitrofurantoin.

279

280

281

282 The negative association between prescribing of tetracyclines or macrolides and ciprofloxacin  
283 resistance is harder to explain. Macrolides are typically active against Gram-positive bacteria,  
284 although they can be effective against Gram-negative bacteria when used in combination with  
285 antibiotics that do have outer-membrane disruptive activity [24]. Given the lack of selective  
286 pressure, *E. coli* are unlikely to frequently harbor resistance mechanisms against antibiotics like  
287 macrolides, which could make such a synergistic combination therapy particularly effective against  
288 Gram-negative bacteria resistant to multiple antibiotics including ciprofloxacin [24]. However, this is  
289 unlikely the cause of the negative association between macrolide use and ciprofloxacin resistance, as  
290 such a combination therapy is not frequently being used or necessary in England. Collateral  
291 sensitivity has been observed for resistance against azithromycin (a macrolide) and sensitivity to  
292 nalidixic acid (a quinolone) among a pathogenic *E. coli* strain [13]. This may partly explain why  
293 macrolides use had a negative association with ciprofloxacin resistance. However, further studies are  
294 needed to evaluate whether these associations are causal.

295

296 Amoxicillin is the most frequently used antibiotic for respiratory conditions which are responsible for  
297 the largest share in inappropriate antibiotic prescribing in primary care [1-3]. Based on the current  
298 and a previous study, amoxicillin prescribing appears to be associated with increased resistance to  
299 amoxicillin, ciprofloxacin and trimethoprim [8]. Together these findings suggest that there is a  
300 substantial potential to reduce selective pressure via (co-)selection through reduction in the amount  
301 of unnecessary treatment with amoxicillin.

302

303 In many countries nitrofurantoin has been adopted as the first-line treatment for uncomplicated  
304 urinary tract infections [25,26]. Compared to other European countries, such as the Netherlands, the  
305 proportion of urinary tract infections treated with nitrofurantoin is much lower in England, though  
306 between June 2017 and June 2018 the ratio of trimethoprim prescribing over trimethoprim plus  
307 nitrofurantoin prescribing substantially decreased from 0.53 to 0.38, subsequent to the national  
308 quality premium [1, 26].

309 Recent recommendations are to prescribe nitrofurantoin as the first choice treatment for  
310 uncomplicated urinary tract infections [8]. We found nitrofurantoin prescribing to be associated with  
311 lower levels of resistance to amoxicillin and it has a negative association with trimethoprim  
312 resistance [8]. Conversely, we previously showed trimethoprim prescribing to be associated with  
313 increased resistance to trimethoprim [8], and, here, associated with high ciprofloxacin resistance.  
314 Our findings therefore suggest that a shift towards more nitrofurantoin instead of trimethoprim for  
315 uncomplicated urinary tract infections could potentially reduce antibiotic resistance among *E. coli*.

316

317 Patterns of co-resistance and co-selection likely differ between various parts of the world as there is  
318 substantial variation in selection pressure by antibiotics and infection prevention and control  
319 between countries [27,28]. However, we would even caution against direct comparison of results  
320 from another recent study from a region in England [29], as that study did not take into account  
321 prescribing of other antibiotics or the potential differences in the propensity to send in samples from  
322 patients. Our results show that areas with low testing rates have artificial high resistance  
323 proportions. This finding emphasizes the importance of accounting for differences in testing  
324 practices when comparing resistance prevalences between different countries or more granular  
325 areas. Ideally sentinel surveillance systems with systematic and standardized testing would be set up  
326 to facilitate less biased between-area comparisons and local pre-test resistance probabilities,  
327 thereby potentially improving future association studies and clinical practice.

328

329 The most obvious limitation of this work is that the associations we found are not necessarily causal.  
330 As with any observational study we could not take into account confounding by unmeasured factors,  
331 such as antibiotic use in hospitals and other potential selective pressures. The unavailability of  
332 hospital prescribing data may have especially affected the analyses focusing on co-amoxiclav and  
333 cephalexin as less than half of co-amoxiclav prescribing and approximately half of cephalosporin  
334 prescribing occurs in the general practice setting [20]. In addition roughly 40% of fluoroquinolones  
335 are prescribed in the hospital setting in England [20]. Such misclassification of exposure/confounders  
336 makes the estimated impact of antibiotics that are commonly used in the hospital less reliable. This  
337 may partly explain why amoxicillin use – only 13% of penicillins are used in the hospital [20] – is  
338 associated with ciprofloxacin resistance, while fluoroquinolone use was not associated with  
339 increased amoxicillin prescribing.

340 Besides the influence of unmeasured confounding, we cannot exclude the possibility that prescribing  
341 differs as a consequence of resistance rather than the other way around, i.e. reverse causation. We  
342 tried to reduce such reverse causation by looking at antibiotic prescribing happening before the  
343 resistance measurement. Nonetheless, reverse causation may reduce the strength of a positive  
344 association or even reverse the association. In addition, some of our results may be partly due to  
345 other types of model misspecification.

346 If we were only interested in the influence of one particular antibiotic, a regularization approach that  
347 penalizes all coefficients except the antibiotic of interest might provide better estimates [30].  
348 However, because different antibiotics may influence resistance levels in various ways, we decide to  
349 penalise all coefficients in the same way, potentially leading to an underestimation of the effect of  
350 antibiotics that increase the prevalence of resistance. Therefore, our estimates should be regarded  
351 as conservative.

352

353 *Conclusion*

354 Amoxicillin prescribing is associated with increased resistance to amoxicillin, ciprofloxacin and  
355 trimethoprim. Amoxicillin is the most frequently used antibiotic for respiratory conditions, which are  
356 responsible for the largest share in inappropriate antibiotic prescribing in primary care. These  
357 findings suggest that there is a potential to reduce selective pressure via (co-)selection with  
358 unnecessary use of amoxicillin for viral and self-limiting respiratory tract infection.  
359 Nitrofurantoin prescribing is associated with lower levels of resistance to amoxicillin and  
360 trimethoprim, while trimethoprim prescribing is associated with increased levels of amoxicillin,  
361 ciprofloxacin and trimethoprim resistance. This suggests that replacing trimethoprim prescribing  
362 with nitrofurantoin prescribing where possible for uncomplicated urinary tract infections may also  
363 be associated with a reduction in trimethoprim, amoxicillin and ciprofloxacin resistance among *E.*  
364 *coli*. The methodology used in this study, that can cope with correlated antibiotic use, can be used  
365 in other settings to further explore the complex relationships between antibiotic use and levels of  
366 antibiotic resistance.

367

## 368 **Methods**

### 369 *Data*

370 All data were collected as part of routine surveillance and were anonymized. Ethics Committee  
371 approval was therefore not required. Antibiotic prescribing data were obtained from NHS Digital,  
372 who collate for all general practices in England the total number of items that are prescribed and  
373 dispensed (<http://digital.nhs.uk/>). Antibiotic groups were created based on the first five characters  
374 of the Anatomical Therapeutic Chemical (ATC) classification system (Fig 1). Antibiotic prescribing was  
375 expressed in daily defined doses (DDDs) per 1000 persons per day for each calendar month at the  
376 clinical commissioning group (CCG) level. Antibiotics were expressed in DDDs as this at least partly  
377 captures the dose and duration of treatment, while this would not be the case when expressing use  
378 in terms of items. This is important, because dose and duration has been shown to be an important  
379 driver of antibiotic resistance [31-33]. Moreover, using DDDs would facilitate incorporating of

380 hospital prescribing when this data becomes available, as antibiotics used in the hospital are  
381 typically expressed in terms of DDDs. CCGs were set up by the Health and Social Care Act 2012 to  
382 organize the delivery of NHS services in England. From April 2018, general practices in England  
383 belong to one of 209 CCGs.

384 Reports of *E. coli* isolated from urine samples from general practice patients between April 2014 and  
385 January 2016 in England were extracted from PHE's Second Generation Surveillance System (SGSS)  
386 (<https://fingertips.phe.org.uk/profile/amr-local-indicators>). This national voluntary laboratory  
387 surveillance system captures antimicrobial susceptibility data of all microorganisms tested. The  
388 database contains laboratory reports supplied electronically by approximately 98% of NHS hospital  
389 microbiology laboratories in England. Repeat specimen reports received from the same patient with  
390 matching causative agents were excluded if the specimen dates were within 30 days [8]. A 30 day  
391 cut-off is often used to distinguish between same and new urinary tract infection episodes. Both  
392 samples categorized as intermediate (I) and resistant (R) were treated as being resistant. The  
393 following antibiotic susceptibility test results for *E. coli* urine samples were analyzed: amoxicillin,  
394 cephalexin, ciprofloxacin, co-amoxiclav and nitrofurantoin. At least 75% of reported *E. coli* urine  
395 isolates extracted from SGSS were tested for resistance against these antibiotics; levels of  
396 susceptibility testing for other antibiotics were not reported frequently enough for a useful analysis.

397 For each calendar month the number of samples tested for resistance against each antibiotic and  
398 the number of samples confirmed as resistant against each antibiotic were measured at the CCG  
399 level. Measurements were only included when at least 10 samples and at least 75% of samples were  
400 tested for resistance against the antibiotic of interest in the CCG.

401

#### 402 *Analyses*

403 Elastic net regularization was used to evaluate the association between the different antibiotic  
404 groups and the five resistances of interest [8, 15, 16]. Elastic net regularization combines the  
405 advantages of least absolute shrinkage and selection operator (lasso) [17] and ridge regression [18].

406 Elastic net regularization is especially useful when encountering situations with high collinearity,  
407 such as strong correlations in antibiotic usage, and a relatively large number of variables (antibiotic  
408 groups) compared to the amount of observations [16, 18, 19]. More conventional regression  
409 techniques would likely result in multi-collinearity and sparsity bias issues [18, 19].

410 We fitted a separate Poisson model with elastic net regularization for each resistance. The number  
411 of *E. coli* isolates from urinary samples reported to be resistant each month was included as the  
412 dependent variable. The natural logarithm of the number of samples being tested was included as  
413 an offset to account for the fact that there is variation in the number of samples tested between  
414 CCGs, thereby effectively modelling resistance as a proportion.

415 Potential explanatory variables were all antibiotics groups (e.g. ATC codes J01AA and J01CA)  
416 prescribed in the month before the monthly measured resistance prevalence (expressed in DDDs per  
417 1000 persons per day), month of the year, calendar year and the test rate. The test rate was defined  
418 as the number of *E. coli* urinary samples tested for the resistance of interest per 1000 persons-  
419 months. The test rate was included because we have previously observed a relatively strong  
420 negative relationship between the test rate and the proportion of samples that are resistant  
421 [8]. Antibiotics and the test rate were standardized by mean-centering and dividing by two standard  
422 deviations. To keep the antibiotic groups on the same scale, all antibiotic groups were mean-  
423 centered and divided by two standard deviations of penicillins with extended spectrum (ATC code  
424 J01CA) instead of using the standard deviations of individual antibiotic groups. To keep all variables,  
425 including binary (dummy) variables, on the same scale all variables were divided by two standard  
426 deviations [34]. After performing the elastic net regularization variables were back transformed to  
427 the original 'DDD per 1000 persons per day' scale.

428 All elastic net analyses were performed using the 'glmnet' package in R version 3.4.3 [16]. To reduce  
429 the false discovery rate often observed with standard application of regularization methods, we  
430 estimated the optimal shrinkage parameter  $\lambda$  using the Akaike information criterion (AIC) [8, 35].

431 Confidence intervals (CIs) were obtained by taking 1000 clustered bootstrap samples, resampling at  
432 the highest level (CCG) with replacement.

433

434 *Secondary analysis*

435 In a secondary analysis we varied the lag time between antibiotic prescribing and the resistances of  
436 interest. First, instead of using antibiotic prescribing in the month before the resistance  
437 measurement as a potential covariate, we evaluated the association between antibiotics used in 1-3  
438 months before the resistance measurements. Further, we assessed the association between  
439 antibiotics used in the year (1-12 months) before the resistance measurements.

440 In addition, we performed a sensitivity analysis, restricting to months with at least 20 measurements  
441 to assess the potential influence of potential random error and systematic error due to low sampling  
442 rates.

443

444 **Funding:**

445 SH and JV are supported by the National Institute for Health Research Health Protection Research  
446 Unit (NIHR HPRU) in Healthcare Associated Infections and Antimicrobial Resistance at the University  
447 of Oxford in partnership with Public Health England (PHE) (HPRU-2012-10041). The views expressed  
448 are those of the authors and not necessarily those of the National Health Service, NIHR, Department  
449 of Health, or PHE.

450

451

452

453

454

455 **S1 Fig S1. Variation in antibiotic prescribing.**

456 Data shown for dispensing of tetracyclines, penicillins with extended spectrum, Beta-lactamase-  
457 resistant penicillins and macrolide. Each line represents a different clinical commissioning group in  
458 England.

459

460 **S1 Fig S2. Variation in antibiotic prescribing.**

461 Data shown for dispensing of trimethoprim, nitrofurantoin, beta-lactamase-sensitive penicillins, and  
462 other antibiotics. Each line represents a different clinical commissioning group in England.

463

464 **S1 Fig S3. Proportion of urinary samples with *E. coli* isolated resistant to amoxicillin/ampicillin.** The

465 boxplot shows the variation in amoxicillin/ampicillin resistance between Clinical Commissioning  
466 Groups over time.

467

468 **S1 Fig S4. Proportion of urinary samples with *E. coli* isolated resistant to co-amoxiclav.** The boxplot

469 shows the variation in co-amoxiclav resistance between Clinical Commissioning Groups over time.

470

471 **S1 Fig S5. Proportion of urinary samples with *E. coli* isolated resistant to cephalexin.** The boxplot

472 shows the variation in cephalexin resistance between Clinical Commissioning Groups over time.

473

474 **S1 Fig S6. Proportion of urinary samples with *E. coli* isolated resistant to ciprofloxacin.** The boxplot

475 shows the variation in ciprofloxacin resistance between Clinical Commissioning Groups over time.

476



477 **S1 Fig S7. Proportion of urinary samples with *E. coli* isolated resistant to nitrofurantoin.** The  
478 boxplot shows the variation in nitrofurantoin resistance between Clinical Commissioning Groups  
479 over time.

480

481 **S2 Table S1. Associations between amoxicillin resistance among *E. coli* urinary samples and**  
482 **antibiotic prescribing.**

483 Antibiotic use is expressed in DDD per 1000 persons per day.

484

485 **S2 Table S2. Associations between nitrofurantoin resistance among *E. coli* urinary samples and**  
486 **antibiotic prescribing.**

487 Antibiotic use is expressed in DDD per 1000 persons per day.

488

489 **S2 Table S3. Associations between cephalexin resistance among *E. coli* urinary samples and**  
490 **antibiotic prescribing.**

491 Antibiotic use is expressed in DDD per 1000 persons per day.

492

493 **S2 Table S4. Associations between ciprofloxacin resistance among *E. coli* urinary samples and**  
494 **antibiotic prescribing.**

495 Antibiotic use is expressed in DDD per 1000 persons per day.

496

497 **S2 Table S5. Associations between co-amoxiclav resistance among *E. coli* urinary samples and**  
498 **antibiotic prescribing.**

499 Antibiotic use is expressed in DDD per 1000 persons per day.

500

501 **S2 Table S6. Associations between amoxicillin resistance among *E. coli* urinary samples and**  
502 **antibiotic prescribing using different thresholds of the minimum number of samples tested.**

503 Antibiotic use is expressed in DDD per 1000 persons per day.

504

505 **S2 Table S7. Associations between nitrofurantoin resistance among *E. coli* urinary samples and**  
506 **antibiotic prescribing using different thresholds of the minimum number of samples tested.**

507 Antibiotic use is expressed in DDD per 1000 persons per day.

508

509 **S2 Table S8. Associations between cephalexin resistance among *E. coli* urinary samples and**  
510 **antibiotic prescribing using different thresholds of the minimum number of samples tested.**

511 Antibiotic use is expressed in DDD per 1000 persons per day.

512

513 **S2 Table S9. Associations between ciprofloxacin resistance among *E. coli* urinary samples and**  
514 **antibiotic prescribing using different thresholds of the minimum number of samples tested.**

515 Antibiotic use is expressed in DDD per 1000 persons per day.

516

517 **S2 Table S10. Associations between co-amoxiclav resistance among *E. coli* urinary samples and**  
518 **antibiotic prescribing using different thresholds of the minimum number of samples tested.**

519 Antibiotic use is expressed in DDD per 1000 persons per day.

520

521

522

523

524

525

526

527

528

529

530 **References**

- 531 1 Dolk FCK, Pouwels KB, Smith DRM, Robotham J V, Smieszek T. Antibiotics in primary  
532 care in England: which antibiotics are prescribed and for which conditions? J  
533 Antimicrob Chemother. 2018; 73 Suppl 2: ii2-ii10.
- 534 2 Smieszek T, Pouwels KB, Dolk FCK, Smith DRM, Hopkins S, Sharland M, et al. Potential  
535 for reducing inappropriate antibiotic prescribing in English primary care. J Antimicrob  
536 Chemother. 2018; 73 Suppl 2: ii36-ii43.
- 537 3 Pouwels KB, Dolk FCK, Smith DRM, Robotham J V, Smieszek T. Actual versus 'ideal'  
538 antibiotic prescribing for common conditions in English primary care. J Antimicrob  
539 Chemother. 2018; 73 Suppl 2: 19–26.
- 540 4 Sullivan Å, Edlund C, Nord CE. Effect of antimicrobial agents on the ecological balance  
541 of human microflora. Lancet Infect Dis. 2001; 1: 101–114.
- 542 5 Bailey JK, Pinyon JL, Anantham S, Hall RM. Commensal Escherichia coli of healthy  
543 humans: a reservoir for antibiotic-resistance determinants. J Med Microbiol. 2010;  
544 59: 1331–1339.
- 545 6 Dale AP, Woodford N. Extra-intestinal pathogenic Escherichia coli (ExPEC): Disease,  
546 carriage and clones. J Infect. 2015; 71: 615–626.
- 547 7 Pouwels KB, Hopkins S, Llewelyn MJ, Walker AS, McNulty CAM, Robotham JV.  
548 Duration of antibiotic treatment for common infections in English primary care: cross-  
549 sectional analysis and comparison with guidelines. 2019; doi: 10.1136/bmj.l440 [in  
550 press]
- 551

- 552 8 Pouwels KB, Freeman R, Muller-Pebody B, Rooney G, Henderson KL, Robotham JV, et  
553 al. Association between use of different antibiotics and trimethoprim resistance:  
554 going beyond the obvious crude association. *J Antimicrob Chemother.* 2018; 73:  
555 1700-1707.
- 556 9 Kahlmeter G, Menday P. Cross-resistance and associated resistance in 2478  
557 *Escherichia coli* isolates from the Pan-European ECO.SENS Project surveying the  
558 antimicrobial susceptibility of pathogens from uncomplicated urinary tract infections.  
559 *J Antimicrob Chemother.* 2003; 52: 128–131.
- 560 10 Donskey CJ, Chowdhry TK, Hecker MT, et al. Effect of Antibiotic Therapy on the  
561 Density of Vancomycin-Resistant Enterococci in the Stool of Colonized Patients. *N*  
562 *Engl J Med.* 2000 343: 1925–1932.
- 563 11 Lipsitch M, Samore MH. Antimicrobial Use and Antimicrobial Resistance: A Population  
564 Perspective. *Emerg Infect Dis.* 2002; 8: 347–354.
- 565 12. Baym M, Stone LK, Kishony R. Multidrug evolutionary strategies to reverse antibiotic  
566 resistance. *Science.* 2016; 351: aad3292.
- 567 13. Imamovic L, Sommer MOA. Use of collateral sensitivity networks to design drug  
568 cycling protocols that avoid resistance development. *Science Transl Med.* 2013; 5:  
569 204ra132.
- 570 14 Chatterjee A, Modarai M, Naylor NR, Boyd SE, Atun R, Barlow J, et al. Quantifying  
571 drivers of antibiotic resistance in humans: a systematic review. *Lancet Infect Dis.*  
572 2018; 18: e368-e378.
- 573 15 Zou H, Hastie T. Regularization and variable selection via the elastic net. *J R Stat Soc*  
574 *Ser B (Statistical Methodol).* 2005; 67: 301–320.

- 575 16 Friedman J, Hastie T, Tibshirani R. Regularization Paths for Generalized Linear Models  
576 via Coordinate Descent. *J Stat Softw.* 2010; 33: 1–22.
- 577 17 Tibshirani R. Regression Shrinkage and Selection via the Lasso. *J R Stat Soc Ser B.*  
578 1996; 58: 267–288.
- 579 18 Hoerl AE, Kennard RW. Ridge Regression: Biased Estimation for Nonorthogonal  
580 Problems. *Technometrics.* 1970; 12: 55.
- 581 19 Greenland S, Mansournia MA, Altman DG. Sparse data bias: a problem hiding in plain  
582 sight. *BMJ.* 2016; 352: i1981.
- 583 20. Public Health England. English surveillance programme for antimicrobial utilisation  
584 and resistance (ESPAUR) report - GOV.UK.  
585 [https://www.gov.uk/government/publications/english-surveillance-programme-](https://www.gov.uk/government/publications/english-surveillance-programme-antimicrobial-utilisation-and-resistance-espaur-report)  
586 [antimicrobial-utilisation-and-resistance-espaur-report.](https://www.gov.uk/government/publications/english-surveillance-programme-antimicrobial-utilisation-and-resistance-espaur-report)
- 587 21 Johnson JR, Johnston B, Clabots C, Kuskowski MA, Castanheira M. Escherichia coli  
588 sequence type ST131 as the major cause of serious multidrug-resistant E. coli  
589 infections in the United States. *Clin Infect Dis.* 2010; 51: 286–294.
- 590 22 Price LB, Johnson JR, Aziz M, Clabots C, Johnston B, Tchesnokova V, et al. The  
591 epidemic of extended-spectrum- $\beta$ -lactamase-producing Escherichia coli ST131 is  
592 driven by a single highly pathogenic subclone, H30-Rx. *MBio.* 2013; 4: e00377-13.
- 593 23 Sandegren L, Lindqvist A, Kahlmeter G, Andersson DI. Nitrofurantoin resistance  
594 mechanism and fitness cost in Escherichia coli. *J Antimicrob Chemother.* 2008; 62:  
595 495–503.
- 596 24 MacNair CR, Stokes JM, Carfrae LA, Fiebig-Comyn AA, Coombes BK, Mulvey MR, et al.

- 597 Overcoming mcr-1 mediated colistin resistance with colistin in combination with  
598 other antibiotics. *Nat Commun.* 2018; 9: 458.
- 599 25. Huttner A, Verhaegh EM, Harbarth S, Muller AE, Theuretzbacher U, Mouton JW.  
600 Nitrofurantoin revisited: a systematic review and meta-analysis of controlled trials. *J*  
601 *Antimicrob Chemother.* 2015; 70: 2456–2464.
- 602 26 Pouwels KB, Visser ST, Bos HJ, Hak E. Angiotensin-converting enzyme inhibitor  
603 treatment and the development of urinary tract infections: A prescription sequence  
604 symmetry analysis. *Drug Saf.* 2013; 36: 1079–1086.
- 605 27 Van Boeckel TP, Gandra S, Ashok A, Caudron Q, Grenfell BT, Levin SA, et al. Global  
606 antibiotic consumption 2000 to 2010: an analysis of national pharmaceutical sales  
607 data. *Lancet Infect Dis.* 2014; 14: 742–750.
- 608 28 Moreland LD, Gore FM, Andre N, Cairncross S, Ensink JHJ. Monitoring the inputs  
609 required to extend and sustain hygiene promotion: findings from the GLAAS  
610 2013/2014 survey. *Trop Med Int Heal* 2016; 21: 1029–1039.
- 611 29 Ironmonger D, Edeghere O, Verlander NQ, Gossain S, Hopkins S, Hilton B, et al. Effect  
612 of general practice characteristics and antibiotic prescribing on *Escherichia coli*  
613 antibiotic non-susceptibility in the West Midlands region of England: a 4-year  
614 ecological study. *J Antimicrob Chemother.* 2018; 73: 787–794.
- 615 30 Chen Q, Nian H, Zhu Y, Talbot HK, Griffin MR, Harrell FE Jr. Too many covariates and  
616 too few cases? - a comparative study. *Stat Med.* 2016; 35: 4546–4558.
- 617 31 Roberts JA, Kruger P, Paterson DL, Lipman J. Antibiotic resistance—What’s dosing got  
618 to do with it? *Crit Care Med.* 2008; 36: 2433–2440.



- 619 32 Day T, Read AF. Does High-Dose Antimicrobial Chemotherapy Prevent the Evolution  
620 of Resistance? PLOS Comput Biol. 2016; 12: e1004689.
- 621 33 Teshome BF, Vouri SM, Hampton N, Kollef MH, Micek ST. Duration of Exposure to  
622 Antipseudomonal  $\beta$ -Lactam Antibiotics in the Critically Ill and Development of New  
623 Resistance. Pharmacother J Hum Pharmacol Drug Ther. 2018; doi:10.1002/phar.2201.
- 624 34 Gelman A. Scaling regression inputs by dividing by two standard deviations. Stat Med.  
625 2008; 27: 2865–2873.
- 626 35 Ternès N, Rotolo F, Michiels S. Empirical extensions of the lasso penalty to reduce the  
627 false discovery rate in high-dimensional Cox regression models. Stat Med. 2016; 35:  
628 2561–2573.
- 629
- 630
- 631
- 632
- 633
- 634
- 635
- 636
- 637
- 638
- 639



641

642

643
